# Supplementary material
Source: publisher figshare collection journal article supplement (https://acs.figshare.com/ndownloader/files/5132947)
Supplement: Supplementary file 1 [file 5132947]

#==============================================================================

data__1a

#==============================================================================
_publ_contact_author_name             'Prof. Noritaka Mizuno'
_publ_contact_author_address            
;
Department of Applied Chemistry,
School of Engineering,
The University of Tokyo,
7-3-1 Hongo, Bunkyo, Tokyo 113-8656
Japan
;
_publ_contact_author_email  tmizuno@mail.ecc.u-tokyo.ac.jp
_publ_contact_author_fax              '81(3)58417220'
_publ_contact_author_phone            '81(3)58417272'

#==============================================================================

# CHEMICAL DATA

_audit_creation_method                 'CrystalStructure 3.6.0' 
_chemical_formula_sum                  'C12 Cr6 N4 O100 P2 W18'
_chemical_formula_weight               5483.32

#==============================================================================

# CRYSTAL DATA
_symmetry_cell_setting                 hexagonal
_symmetry_space_group_name_H-M        'P 63/m'
_symmetry_Int_Tables_number            176
loop_
_symmetry_equiv_pos_site_id
_symmetry_equiv_pos_as_xyz
1   '+X,+Y,+Z'
2   '+X-Y,+X,1/2+Z'
3   '-Y,+X-Y,+Z'
4   '-X,-Y,1/2+Z'
5   '-X+Y,-X,+Z'
6   '+Y,-X+Y,1/2+Z'
7   '-X,-Y,-Z'
8   '-X+Y,-X,1/2-Z'
9   '+Y,-X+Y,-Z'
10  '+X,+Y,1/2-Z'
11  '+X-Y,+X,-Z'
12  '-Y,+X-Y,1/2-Z'

#------------------------------------------------------------------------------

_cell_length_a                         16.009(4)
_cell_length_b                         16.009(4)
_cell_length_c                         21.785(9)
_cell_angle_alpha                      90
_cell_angle_beta                       90
_cell_angle_gamma                      120
_cell_volume                           4835(2)
_cell_formula_units_Z                  2
_cell_measurement_reflns_used          25
_cell_measurement_theta_min            14.5
_cell_measurement_theta_max            15.0
_cell_measurement_temperature          296.1

#------------------------------------------------------------------------------

_exptl_crystal_description            'plate'
_exptl_crystal_colour                 'green'
_exptl_crystal_size_max                0.20
_exptl_crystal_size_mid                0.20
_exptl_crystal_size_min                0.01
_exptl_crystal_density_diffrn          3.766
_exptl_crystal_density_meas            ?
_exptl_crystal_density_method         'not measured'
_exptl_crystal_F_000                   4812.00
_exptl_absorpt_coefficient_mu          22.136
_exptl_absorpt_correction_type         psiscan
_exptl_absorpt_process_details         '(North, Phillips & Mathews, 1968)'
_exptl_absorpt_correction_T_min        0.005
_exptl_absorpt_correction_T_max        0.012

#==============================================================================

# EXPERIMENTAL DATA

_diffrn_radiation_type                'Mo K\a'
_diffrn_radiation_wavelength           0.7107
_diffrn_measurement_device_type       'Rigaku AFC7R'
_diffrn_measurement_method             \w-2\q
_diffrn_reflns_number                  4220
_diffrn_reflns_av_R_equivalents        0.046
_diffrn_reflns_theta_max               27.53
_diffrn_measured_fraction_theta_max    0.9987
_diffrn_reflns_theta_full              27.53
_diffrn_measured_fraction_theta_full   0.9987
_diffrn_reflns_limit_h_min             0
_diffrn_reflns_limit_h_max             18
_diffrn_reflns_limit_k_min             0
_diffrn_reflns_limit_k_max             18
_diffrn_reflns_limit_l_min             -28
_diffrn_reflns_limit_l_max             0

_diffrn_standards_number               3
_diffrn_standards_interval_count       0
_diffrn_standards_decay_%              1.50

#==============================================================================

# REFINEMENT DATA

_refine_special_details
;
    Refinement using reflections with F^2^ > 3.0 sigma(F^2^).
    The weighted R-factor(wR), goodness of fit (S) and R-factor (gt) are 
    based on F, with F set to zero for negative F. The threshold expression of
    F^2^ > 2.0 sigma(F^2^) is used only for calculating R-factor (gt).
;
_reflns_number_total                   3812
_reflns_number_gt                      2320
_reflns_threshold_expression           F^2^>2.0\s(F^2^)
_refine_ls_structure_factor_coef       F
_refine_ls_R_factor_gt                 0.0420
_refine_ls_wR_factor_ref               0.0450
_refine_ls_hydrogen_treatment          ?
_refine_ls_number_reflns               2320
_refine_ls_number_parameters           190
_refine_ls_goodness_of_fit_ref         1.128
_refine_ls_weighting_scheme            unit
_refine_ls_weighting_details
'w = 1.0'
_refine_ls_shift/su_max                0.1240
_refine_diff_density_max               1.76
_refine_diff_density_min               -1.59
_refine_ls_extinction_method           none
_refine_ls_extinction_coef             ?

loop_
_atom_type_symbol
_atom_type_description
_atom_type_scat_dispersion_real
_atom_type_scat_dispersion_imag
_atom_type_scat_source
  'C' 'C'  0.003 0.002 
;
International Tables for Crystallography
(1992, Vol. C, Tables 4.2.6.8 and 6.1.1.4)
;
  'O' 'O'  0.011 0.006 
;
International Tables for Crystallography
(1992, Vol. C, Tables 4.2.6.8 and 6.1.1.4)
;
  'Cr' 'Cr'  0.321 0.624 
;
International Tables for Crystallography
(1992, Vol. C, Tables 4.2.6.8 and 6.1.1.4)
;
  'W' 'W'  -0.849 6.872 
;
International Tables for Crystallography
(1992, Vol. C, Tables 4.2.6.8 and 6.1.1.4)
;
  'P' 'P'  0.102 0.094 
;
International Tables for Crystallography
(1992, Vol. C, Tables 4.2.6.8 and 6.1.1.4)
;
  'N' 'N'  0.006 0.003 
;
International Tables for Crystallography
(1992, Vol. C, Tables 4.2.6.8 and 6.1.1.4)
;

#==============================================================================

# ATOMIC COORDINATES AND THERMAL PARAMETERS

loop_
_atom_site_label
_atom_site_type_symbol
_atom_site_fract_x
_atom_site_fract_y
_atom_site_fract_z
_atom_site_U_iso_or_equiv
_atom_site_adp_type
_atom_site_occupancy
_atom_site_symmetry_multiplicity
_atom_site_calc_flag
_atom_site_refinement_flags
_atom_site_disorder_assembly
_atom_site_disorder_group
 W(1)   W  0.33200(5)  0.44567(5)  0.16398(4)  0.0230(2)   Uani 1.00 1 d . . .
 W(2)   W  0.55865(5)  0.67845(5)  0.16419(4)  0.0225(2)   Uani 1.00 1 d . . .
 W(3)   W  0.40632(6)  0.59872(6)  0.02479(3)  0.0324(2)   Uani 1.00 1 d . . .
 Cr(1)  Cr 0.5328(3)   0.2853(3)   0.2500      0.031(1)    Uani 1.00 2 d S . .
 Cr(2)  Cr 0.9246(4)   0.8614(4)   0.1535(3)   0.022(1)    Uiso 0.50 1 d P . .
 P(1)   P  0.3333      0.6667      0.1590(3)   0.020(1)    Uani 1.00 3 d S . .
 O(1)   O  0.4573(9)   0.5514(9)   0.1782(6)   0.025(3)    Uani 1.00 1 d . . .
 O(2)   O  0.350(1)    0.495(1)    0.0816(6)   0.034(4)    Uani 1.00 1 d . . .
 O(3)   O  0.283(1)    0.5625(8)   0.1802(5)   0.022(3)    Uani 1.00 1 d . . .
 O(4)   O  0.315(1)    0.431(1)    0.2500      0.023(4)    Uani 1.00 2 d S . .
 O(5)   O  0.1958(9)   0.3801(9)   0.1502(6)   0.028(3)    Uani 1.00 1 d . . .
 O(6)   O  0.349(1)    0.3508(9)   0.1478(8)   0.039(4)    Uani 1.00 1 d . . .
 O(7)   O  0.5099(9)   0.661(1)    0.0813(6)   0.028(4)    Uani 1.00 1 d . . .
 O(8)   O  0.575(1)    0.698(1)    0.2500      0.027(5)    Uani 1.00 2 d S . .
 O(9)   O  0.6545(9)   0.6626(9)   0.1488(7)   0.032(4)    Uani 1.00 1 d . . .
 O(10)  O  0.3333      0.6667      0.0872(8)   0.020(4)    Uani 1.00 3 d S . .
 O(11)  O  0.454(1)    0.557(1)    -0.0291(7)  0.052(5)    Uani 1.00 1 d . . .
 O(12)  O  0.279(1)    0.555(1)    -0.0083(5)  0.031(4)    Uani 1.00 1 d . . .
 O(13)  O  0.6667      0.3333      0.2500      0.032(7)    Uiso 1.00 6 d S . .
 O(14)  O  0.503(1)    0.188(1)    0.1872(9)   0.057(5)    Uiso 1.00 1 d . . .
 O(15)  O  0.385(2)    0.234(2)    0.2500      0.059(7)    Uiso 1.00 2 d S . .
 O(16)  O  0.538(1)    0.373(1)    0.1842(8)   0.054(4)    Uiso 1.00 1 d . . .
 O(17)  O  0.842(2)    0.715(2)    0.156(1)    0.031(6)    Uiso 0.50 1 d P . .
 O(18)  O  1.002(2)    0.846(2)    0.090(1)    0.038(7)    Uiso 0.50 1 d P . .
 O(19)  O  1.001(2)    0.846(2)    0.220(1)    0.027(6)    Uiso 0.50 1 d P . .
 O(20)  O  0.837(2)    0.858(2)    0.091(1)    0.036(7)    Uiso 0.50 1 d P . .
 O(21)  O  0.834(2)    0.855(2)    0.220(1)    0.032(6)    Uiso 0.50 1 d P . .
 O(22)  O  1.0000      1.0000      0.152(2)    0.021(8)    Uiso 0.50 3 d SP . .
 O(23)  O  0.825(3)    0.631(3)    0.063(2)    0.19(2)     Uiso 1.00 1 d . . .
 N(1)   N  0.321(2)    0.332(2)    -0.004(1)   0.031(5)    Uiso 0.67 1 d P . .
 C(1)   C  0.602(1)    0.452(1)    0.164(1)    0.035(4)    Uiso 1.00 1 d . . .
 C(2)   C  1.087(4)    0.896(4)    0.2500      0.07(1)     Uiso 1.00 2 d S . .
 C(3)   C  0.814(3)    0.914(3)    0.077(2)    0.026(8)    Uiso 0.50 1 d P . .


loop_
_atom_site_aniso_label
_atom_site_aniso_U_11
_atom_site_aniso_U_22
_atom_site_aniso_U_33
_atom_site_aniso_U_12
_atom_site_aniso_U_13
_atom_site_aniso_U_23
 W(1)   0.0211(3)   0.0190(3)   0.0295(4)   0.0106(3)   -0.0010(3)  -0.0041(3) 
 W(2)   0.0193(3)   0.0213(3)   0.0274(4)   0.0104(3)   0.0038(3)   -0.0008(3) 
 W(3)   0.0407(5)   0.0425(5)   0.0171(3)   0.0231(4)   0.0034(4)   -0.0046(4) 
 Cr(1)  0.025(2)    0.028(2)    0.038(3)    0.011(2)    0.0000      0.0000     
 P(1)   0.024(2)    0.024(2)    0.010(3)    0.012(1)    0.0000      0.0000     
 O(1)   0.026(6)    0.024(6)    0.027(7)    0.013(5)    -0.001(5)   -0.010(5)  
 O(2)   0.040(8)    0.028(7)    0.026(7)    0.011(7)    -0.002(6)   -0.013(6)  
 O(3)   0.039(7)    0.021(6)    0.014(6)    0.020(6)    -0.001(5)   -0.006(5)  
 O(4)   0.021(9)    0.024(9)    0.013(8)    0.003(8)    0.0000      0.0000     
 O(5)   0.023(6)    0.026(7)    0.029(7)    0.007(5)    -0.001(5)   -0.000(5)  
 O(6)   0.028(7)    0.016(6)    0.07(1)     0.007(6)    -0.004(7)   -0.006(7)  
 O(7)   0.025(7)    0.038(8)    0.019(7)    0.014(6)    0.004(5)    -0.000(6)  
 O(8)   0.03(1)     0.02(1)     0.03(1)     0.015(8)    0.0000      0.0000     
 O(9)   0.021(6)    0.022(6)    0.05(1)     0.009(5)    0.011(6)    0.010(6)   
 O(10)  0.026(7)    0.026(7)    0.008(9)    0.013(3)    0.0000      0.0000     
 O(11)  0.06(1)     0.06(1)     0.041(9)    0.039(9)    0.008(9)    -0.000(9)  
 O(12)  0.036(8)    0.048(8)    0.012(6)    0.022(7)    -0.004(6)   -0.003(6)  

#==============================================================================

_computing_data_collection            'MSC/AFC Diffractometer Control'
_computing_cell_refinement            'MSC/AFC Diffractometer Control'
_computing_data_reduction             'CrystalStructure'
_computing_structure_solution         'DIRDIF99 (PATTY)'
_computing_structure_refinement       'CRYSTALS'
_computing_publication_material       'CrystalStructure 3.6.0'

#==============================================================================

# MOLECULAR GEOMETRY

loop_
_geom_bond_atom_site_label_1
_geom_bond_atom_site_label_2
_geom_bond_distance
_geom_bond_publ_flag
_geom_bond_site_symmetry_1
_geom_bond_site_symmetry_2
W(1)      O(1)      1.89(1)     ?     . .
W(1)      O(2)      1.92(1)     ?     . .
W(1)      O(3)      2.39(2)     ?     . .
W(1)      O(4)      1.891(2)    ?     . .
W(1)      O(5)      1.91(1)     ?     . .
W(1)      O(6)      1.71(2)     ?     . .
W(2)      O(1)      1.89(1)     ?     . .
W(2)      O(3)      2.38(2)     ?     . 66503
W(2)      O(5)      1.93(1)     ?     . 66503
W(2)      O(7)      1.93(1)     ?     . .
W(2)      O(8)      1.891(3)    ?     . .
W(2)      O(9)      1.71(2)     ?     . .
W(3)      O(2)      1.90(1)     ?     . .
W(3)      O(7)      1.90(1)     ?     . .
W(3)      O(10)     2.38(1)     ?     . .
W(3)      O(10)     2.38(1)     ?     . 66503
W(3)      O(10)     2.38(1)     ?     . 56505
W(3)      O(11)     1.70(2)     ?     . .
W(3)      O(12)     1.93(2)     ?     . .
W(3)      O(12)     1.93(2)     ?     . 66503
Cr(1)     O(13)     1.881(5)    ?     . .
Cr(1)     O(13)     1.881(5)    ?     . 65503
Cr(1)     O(13)     1.880(5)    ?     . 66505
Cr(1)     O(14)     1.95(2)     ?     . .
Cr(1)     O(14)     1.95(2)     ?     . 55510
Cr(1)     O(15)     2.08(3)     ?     . .
Cr(1)     O(16)     1.98(2)     ?     . .
Cr(1)     O(16)     1.98(2)     ?     . 55510
Cr(2)     O(17)     2.03(2)     ?     . .
Cr(2)     O(18)     1.95(4)     ?     . .
Cr(2)     O(19)     1.99(3)     ?     . .
Cr(2)     O(20)     1.94(3)     ?     . .
Cr(2)     O(21)     2.01(3)     ?     . .
Cr(2)     O(22)     1.924(5)    ?     . .
P(1)      P(1)      0.002(8)    ?     . 66503
P(1)      P(1)      0.002(8)    ?     . 56505
P(1)      O(3)      1.52(1)     ?     . .
P(1)      O(3)      1.52(1)     ?     . 66503
P(1)      O(3)      1.51(2)     ?     . 56505
P(1)      O(10)     1.57(2)     ?     . .
P(1)      O(10)     1.57(2)     ?     . 66503
P(1)      O(10)     1.57(2)     ?     . 56505
O(3)      W(2)      2.38(1)     ?     . 56505
O(3)      P(1)      1.51(1)     ?     . 66503
O(3)      P(1)      1.52(1)     ?     . 56505
O(4)      W(1)      1.891(2)    ?     . 55510
O(5)      W(2)      1.93(2)     ?     . 56505
O(8)      W(2)      1.891(3)    ?     . 55510
O(10)     W(3)      2.38(1)     ?     . 66503
O(10)     W(3)      2.38(1)     ?     . 56505
O(10)     P(1)      1.57(2)     ?     . 66503
O(10)     P(1)      1.57(2)     ?     . 56505
O(10)     O(10)     0.00(2)     ?     . 66503
O(10)     O(10)     0.00(2)     ?     . 56505
O(12)     W(3)      1.93(2)     ?     . 56505
O(13)     Cr(1)     1.880(6)    ?     . 65503
O(13)     Cr(1)     1.881(4)    ?     . 66505
O(13)     O(13)     0.0(3)      ?     . 65503
O(13)     O(13)     0.0(3)      ?     . 66505
O(13)     O(13)     0.0(3)      ?     . 66508
O(13)     O(13)     0.0(3)      ?     . 65512
O(14)     C(1)      1.25(4)     ?     . 65503
O(16)     C(1)      1.24(2)     ?     . .
O(19)     O(19)     1.32(4)     ?     . 55510
O(19)     C(2)      1.36(5)     ?     . .
O(20)     C(3)      1.18(7)     ?     . .
O(21)     O(21)     1.32(4)     ?     . 55510
C(1)      O(14)     1.25(3)     ?     . 66505
C(2)      O(19)     1.36(5)     ?     . 55510

loop_
_geom_angle_atom_site_label_1
_geom_angle_atom_site_label_2
_geom_angle_atom_site_label_3
_geom_angle
_geom_angle_publ_flag
_geom_angle_site_symmetry_1
_geom_angle_site_symmetry_2
_geom_angle_site_symmetry_3
O(2)      W(1)      O(1)      84.8(5)     ?     . . .
O(3)      W(1)      O(1)      83.7(6)     ?     . . .
O(4)      W(1)      O(1)      88.2(6)     ?     . . .
O(5)      W(1)      O(1)      157.4(7)    ?     . . .
O(6)      W(1)      O(1)      105.2(7)    ?     . . .
W(1)      O(1)      W(2)      153.1(9)    ?     . . .
O(3)      W(1)      O(2)      82.0(6)     ?     . . .
O(4)      W(1)      O(2)      163.4(8)    ?     . . .
O(5)      W(1)      O(2)      88.7(6)     ?     . . .
O(6)      W(1)      O(2)      96.4(8)     ?     . . .
W(1)      O(2)      W(3)      151.1(7)    ?     . . .
W(1)      O(3)      W(2)      89.8(4)     ?     . . 56505
W(1)      O(3)      P(1)      128.2(8)    ?     . . .
W(1)      O(3)      P(1)      128.1(8)    ?     . . 66503
W(1)      O(3)      P(1)      128.1(8)    ?     . . 56505
O(4)      W(1)      O(3)      82.3(8)     ?     . . .
O(5)      W(1)      O(3)      74.0(5)     ?     . . .
O(6)      W(1)      O(3)      170.8(5)    ?     . . .
O(5)      W(1)      O(4)      92.0(6)     ?     . . .
O(6)      W(1)      O(4)      100.0(9)    ?     . . .
W(1)      O(4)      W(1)      164.7(8)    ?     . . 55510
W(1)      O(5)      W(2)      122.1(7)    ?     . . 56505
O(6)      W(1)      O(5)      97.0(6)     ?     . . .
O(3)      W(2)      O(1)      84.2(6)     ?     66503 . .
O(5)      W(2)      O(1)      157.8(7)    ?     66503 . .
O(7)      W(2)      O(1)      85.8(5)     ?     . . .
O(8)      W(2)      O(1)      89.3(6)     ?     . . .
O(9)      W(2)      O(1)      102.9(7)    ?     . . .
W(2)      O(3)      P(1)      127.8(8)    ?     . 66503 .
W(2)      O(3)      P(1)      127.8(8)    ?     . 66503 66503
W(2)      O(3)      P(1)      127.8(8)    ?     . 66503 56505
W(2)      O(3)      W(1)      89.8(4)     ?     . 66503 66503
O(5)      W(2)      O(3)      73.8(5)     ?     66503 . 66503
O(7)      W(2)      O(3)      81.4(6)     ?     . . 66503
O(8)      W(2)      O(3)      82.6(8)     ?     . . 66503
O(9)      W(2)      O(3)      172.6(5)    ?     . . 66503
W(2)      O(5)      W(1)      122.1(6)    ?     . 66503 66503
O(7)      W(2)      O(5)      87.5(6)     ?     . . 66503
O(8)      W(2)      O(5)      91.2(7)     ?     . . 66503
O(9)      W(2)      O(5)      98.9(6)     ?     . . 66503
O(8)      W(2)      O(7)      163.7(9)    ?     . . .
O(9)      W(2)      O(7)      97.1(7)     ?     . . .
W(2)      O(7)      W(3)      150.0(7)    ?     . . .
O(9)      W(2)      O(8)      99.2(9)     ?     . . .
W(2)      O(8)      W(2)      162.8(9)    ?     . . 55510
O(7)      W(3)      O(2)      86.7(6)     ?     . . .
O(10)     W(3)      O(2)      84.5(6)     ?     . . .
O(10)     W(3)      O(2)      84.5(6)     ?     66503 . .
O(10)     W(3)      O(2)      84.5(6)     ?     56505 . .
O(11)     W(3)      O(2)      102.2(8)    ?     . . .
O(12)     W(3)      O(2)      88.6(6)     ?     . . .
O(12)     W(3)      O(2)      157.4(7)    ?     66503 . .
O(10)     W(3)      O(7)      83.7(6)     ?     . . .
O(10)     W(3)      O(7)      83.7(6)     ?     66503 . .
O(10)     W(3)      O(7)      83.6(6)     ?     56505 . .
O(11)     W(3)      O(7)      102.1(8)    ?     . . .
O(12)     W(3)      O(7)      156.7(7)    ?     . . .
O(12)     W(3)      O(7)      87.4(6)     ?     66503 . .
W(3)      O(10)     P(1)      124.8(4)    ?     . . .
W(3)      O(10)     P(1)      124.8(4)    ?     . . 66503
W(3)      O(10)     P(1)      124.8(4)    ?     . . 56505
W(3)      O(10)     W(3)      90.6(5)     ?     . . 66503
W(3)      O(10)     W(3)      90.6(5)     ?     . . 56505
W(3)      O(10)     O(10)     45(75)      ?     . . 66503
O(10)     W(3)      O(10)     0.0(5)      ?     66503 . .
W(3)      O(10)     O(10)     43(76)      ?     . . 56505
O(10)     W(3)      O(10)     0.0(5)      ?     56505 . .
O(11)     W(3)      O(10)     171.3(8)    ?     . . .
O(12)     W(3)      O(10)     73.2(5)     ?     . . .
O(12)     W(3)      O(10)     73.2(5)     ?     66503 . .
W(3)      O(10)     P(1)      124.9(4)    ?     . 66503 .
W(3)      O(10)     P(1)      124.8(4)    ?     . 66503 66503
W(3)      O(10)     P(1)      124.8(4)    ?     . 66503 56505
W(3)      O(10)     W(3)      90.6(5)     ?     . 66503 66503
W(3)      O(10)     W(3)      90.7(5)     ?     . 66503 56505
W(3)      O(10)     O(10)     134(75)     ?     . 66503 .
W(3)      O(10)     O(10)     89(49)      ?     . 66503 56505
O(10)     W(3)      O(10)     0.0(5)      ?     56505 . 66503
O(11)     W(3)      O(10)     171.3(8)    ?     . . 66503
O(12)     W(3)      O(10)     73.2(5)     ?     . . 66503
O(12)     W(3)      O(10)     73.2(5)     ?     66503 . 66503
W(3)      O(10)     P(1)      124.9(4)    ?     . 56505 .
W(3)      O(10)     P(1)      124.8(4)    ?     . 56505 66503
W(3)      O(10)     P(1)      124.8(4)    ?     . 56505 56505
W(3)      O(10)     W(3)      90.7(5)     ?     . 56505 66503
W(3)      O(10)     W(3)      90.6(5)     ?     . 56505 56505
W(3)      O(10)     O(10)     135(77)     ?     . 56505 .
W(3)      O(10)     O(10)     90(49)      ?     . 56505 66503
O(11)     W(3)      O(10)     171.3(8)    ?     . . 56505
O(12)     W(3)      O(10)     73.2(5)     ?     . . 56505
O(12)     W(3)      O(10)     73.2(5)     ?     66503 . 56505
O(12)     W(3)      O(11)     101.2(7)    ?     . . .
O(12)     W(3)      O(11)     100.3(8)    ?     66503 . .
W(3)      O(12)     W(3)      123.0(7)    ?     . . 56505
O(12)     W(3)      O(12)     88.3(6)     ?     66503 . .
W(3)      O(12)     W(3)      123.0(7)    ?     . 66503 66503
Cr(1)     O(13)     Cr(1)     120.0(2)    ?     . . 65503
Cr(1)     O(13)     Cr(1)     120.0(3)    ?     . . 66505
Cr(1)     O(13)     O(13)     80.7(2)     ?     . . 65503
O(13)     Cr(1)     O(13)     0.0481(1)   ?     65503 . .
Cr(1)     O(13)     O(13)     20.7(2)     ?     . . 66505
O(13)     Cr(1)     O(13)     0.0173(2)   ?     66505 . .
O(14)     Cr(1)     O(13)     95.6(7)     ?     . . .
O(14)     Cr(1)     O(13)     95.6(7)     ?     55510 . .
O(15)     Cr(1)     O(13)     179.2(9)    ?     . . .
O(16)     Cr(1)     O(13)     94.3(6)     ?     . . .
O(16)     Cr(1)     O(13)     94.3(6)     ?     55510 . .
Cr(1)     O(13)     O(13)     80.7(2)     ?     . . 65503
O(13)     Cr(1)     O(13)     0.0481(1)   ?     65503 . .
Cr(1)     O(13)     O(13)     20.7(2)     ?     . . 66505
O(13)     Cr(1)     O(13)     0.0173(2)   ?     66505 . .
Cr(1)     O(13)     Cr(1)     120.0(2)    ?     . 65503 65503
Cr(1)     O(13)     Cr(1)     120.0(3)    ?     . 65503 66505
Cr(1)     O(13)     O(13)     99.2(2)     ?     . 65503 .
Cr(1)     O(13)     O(13)     39.2(2)     ?     . 65503 66505
O(13)     Cr(1)     O(13)     0.0309(1)   ?     66505 . 65503
O(14)     Cr(1)     O(13)     95.6(7)     ?     . . 65503
O(14)     Cr(1)     O(13)     95.6(7)     ?     55510 . 65503
O(15)     Cr(1)     O(13)     179.1(9)    ?     . . 65503
O(16)     Cr(1)     O(13)     94.3(6)     ?     . . 65503
O(16)     Cr(1)     O(13)     94.3(6)     ?     55510 . 65503
Cr(1)     O(13)     O(13)     99.2(2)     ?     . 65503 .
O(13)     Cr(1)     O(13)     0.0481(1)   ?     . . 65503
Cr(1)     O(13)     O(13)     39.2(2)     ?     . 65503 66505
O(13)     Cr(1)     O(13)     0.0309(1)   ?     66505 . 65503
Cr(1)     O(13)     Cr(1)     120.0(2)    ?     . 66505 65503
Cr(1)     O(13)     Cr(1)     120.0(3)    ?     . 66505 66505
Cr(1)     O(13)     O(13)     159.3(2)    ?     . 66505 .
Cr(1)     O(13)     O(13)     140.7(2)    ?     . 66505 65503
O(14)     Cr(1)     O(13)     95.6(7)     ?     . . 66505
O(14)     Cr(1)     O(13)     95.6(7)     ?     55510 . 66505
O(15)     Cr(1)     O(13)     179.2(9)    ?     . . 66505
O(16)     Cr(1)     O(13)     94.3(6)     ?     . . 66505
O(16)     Cr(1)     O(13)     94.3(6)     ?     55510 . 66505
Cr(1)     O(13)     O(13)     159.3(2)    ?     . 66505 .
O(13)     Cr(1)     O(13)     0.0173(2)   ?     . . 66505
Cr(1)     O(13)     O(13)     140.7(2)    ?     . 66505 65503
O(13)     Cr(1)     O(13)     0.0309(1)   ?     65503 . 66505
O(14)     Cr(1)     O(14)     89.3(8)     ?     55510 . .
O(15)     Cr(1)     O(14)     85.0(9)     ?     . . .
O(16)     Cr(1)     O(14)     88.1(8)     ?     . . .
O(16)     Cr(1)     O(14)     170.0(8)    ?     55510 . .
Cr(1)     O(14)     C(1)      134(1)      ?     . . 65503
O(13)     Cr(1)     O(14)     95.6(7)     ?     . . .
O(13)     Cr(1)     O(14)     95.6(7)     ?     65503 . .
O(13)     Cr(1)     O(14)     95.6(7)     ?     66505 . .
O(15)     Cr(1)     O(14)     85.0(9)     ?     . . 55510
O(16)     Cr(1)     O(14)     170.0(8)    ?     . . 55510
O(16)     Cr(1)     O(14)     88.1(8)     ?     55510 . 55510
Cr(1)     O(14)     C(1)      134(1)      ?     . 55510 65512
O(13)     Cr(1)     O(14)     95.6(7)     ?     . . 55510
O(13)     Cr(1)     O(14)     95.6(7)     ?     65503 . 55510
O(13)     Cr(1)     O(14)     95.6(7)     ?     66505 . 55510
O(16)     Cr(1)     O(15)     85.1(8)     ?     . . .
O(16)     Cr(1)     O(15)     85.1(8)     ?     55510 . .
O(13)     Cr(1)     O(15)     179.2(9)    ?     . . .
O(13)     Cr(1)     O(15)     179.1(9)    ?     65503 . .
O(13)     Cr(1)     O(15)     179.2(9)    ?     66505 . .
O(16)     Cr(1)     O(16)     92.8(9)     ?     55510 . .
Cr(1)     O(16)     C(1)      134(1)      ?     . . .
O(13)     Cr(1)     O(16)     94.3(6)     ?     . . .
O(13)     Cr(1)     O(16)     94.3(6)     ?     65503 . .
O(13)     Cr(1)     O(16)     94.3(6)     ?     66505 . .
Cr(1)     O(16)     C(1)      134(1)      ?     . 55510 55510
O(13)     Cr(1)     O(16)     94.3(6)     ?     . . 55510
O(13)     Cr(1)     O(16)     94.3(6)     ?     65503 . 55510
O(13)     Cr(1)     O(16)     94.3(6)     ?     66505 . 55510
O(18)     Cr(2)     O(17)     87(1)       ?     . . .
O(19)     Cr(2)     O(17)     85(1)       ?     . . .
O(20)     Cr(2)     O(17)     86(1)       ?     . . .
O(21)     Cr(2)     O(17)     83(1)       ?     . . .
O(22)     Cr(2)     O(17)     178(1)      ?     . . .
O(19)     Cr(2)     O(18)     91(1)       ?     . . .
O(20)     Cr(2)     O(18)     89(1)       ?     . . .
O(21)     Cr(2)     O(18)     170(1)      ?     . . .
O(22)     Cr(2)     O(18)     93(1)       ?     . . .
Cr(2)     O(19)     O(19)     136(2)      ?     . . 55510
O(20)     Cr(2)     O(19)     172(1)      ?     . . .
O(21)     Cr(2)     O(19)     86(1)       ?     . . .
O(22)     Cr(2)     O(19)     94(1)       ?     . . .
Cr(2)     O(19)     C(2)      141(2)      ?     . . .
O(21)     Cr(2)     O(20)     91(1)       ?     . . .
O(22)     Cr(2)     O(20)     92(1)       ?     . . .
Cr(2)     O(20)     C(3)      131(2)      ?     . . .
Cr(2)     O(21)     O(21)     136(2)      ?     . . 55510
O(22)     Cr(2)     O(21)     95(1)       ?     . . .
P(1)      P(1)      P(1)      60(58)      ?     . 66503 56505
P(1)      P(1)      P(1)      59(58)      ?     56505 . 66503
P(1)      P(1)      O(3)      146(69)     ?     . 66503 .
O(3)      P(1)      P(1)      33(69)      ?     . . 66503
P(1)      P(1)      O(3)      88(24)      ?     . 66503 66503
O(3)      P(1)      P(1)      91(24)      ?     66503 . 66503
P(1)      P(1)      O(10)     89(110)     ?     . 66503 .
O(10)     P(1)      P(1)      90(110)     ?     . . 66503
P(1)      P(1)      O(10)     89(110)     ?     . 66503 66503
O(10)     P(1)      P(1)      89(110)     ?     66503 . 66503
P(1)      P(1)      O(10)     89(110)     ?     . 66503 56505
O(10)     P(1)      P(1)      89(110)     ?     56505 . 66503
P(1)      P(1)      O(3)      35(66)      ?     . 66503 56505
O(3)      P(1)      P(1)      144(67)     ?     56505 . 66503
P(1)      P(1)      P(1)      60(58)      ?     . 56505 66503
P(1)      P(1)      O(3)      91(24)      ?     . 56505 .
O(3)      P(1)      P(1)      88(24)      ?     . . 56505
P(1)      P(1)      O(3)      144(67)     ?     . 56505 66503
O(3)      P(1)      P(1)      35(66)      ?     66503 . 56505
P(1)      P(1)      O(10)     89(110)     ?     . 56505 .
O(10)     P(1)      P(1)      89(110)     ?     . . 56505
P(1)      P(1)      O(10)     89(110)     ?     . 56505 66503
O(10)     P(1)      P(1)      89(110)     ?     66503 . 56505
P(1)      P(1)      O(10)     90(110)     ?     . 56505 56505
O(10)     P(1)      P(1)      89(110)     ?     56505 . 56505
P(1)      P(1)      O(3)      33(69)      ?     . 56505 56505
O(3)      P(1)      P(1)      146(69)     ?     56505 . 56505
P(1)      O(3)      W(2)      127.8(9)    ?     . . 56505
P(1)      O(3)      P(1)      0.0(3)      ?     . . 66503
P(1)      O(3)      P(1)      0.1(3)      ?     . . 56505
O(3)      P(1)      O(3)      111.1(8)    ?     66503 . .
O(10)     P(1)      O(3)      107.7(5)    ?     . . .
O(10)     P(1)      O(3)      107.6(5)    ?     66503 . .
O(10)     P(1)      O(3)      107.7(5)    ?     56505 . .
O(3)      P(1)      O(3)      111.2(8)    ?     56505 . .
P(1)      O(3)      P(1)      0.1(3)      ?     . 66503 66503
P(1)      O(3)      P(1)      0.0(3)      ?     . 66503 56505
P(1)      O(3)      W(1)      128.1(9)    ?     . 66503 66503
O(10)     P(1)      O(3)      107.7(5)    ?     . . 66503
O(10)     P(1)      O(3)      107.7(5)    ?     66503 . 66503
O(10)     P(1)      O(3)      107.6(5)    ?     56505 . 66503
O(3)      P(1)      O(3)      111.2(8)    ?     56505 . 66503
P(1)      O(3)      P(1)      0.0(3)      ?     . 56505 66503
P(1)      O(3)      P(1)      0.0(3)      ?     . 56505 56505
O(10)     P(1)      O(3)      107.7(5)    ?     . . 56505
O(10)     P(1)      O(3)      107.8(5)    ?     66503 . 56505
O(10)     P(1)      O(3)      107.8(5)    ?     56505 . 56505
P(1)      O(3)      W(1)      128.1(6)    ?     . 56505 56505
P(1)      O(3)      W(2)      127.8(6)    ?     . 56505 66503
P(1)      O(10)     P(1)      0.0586(7)   ?     . . 66503
P(1)      O(10)     P(1)      0.0586(7)   ?     . . 56505
P(1)      O(10)     W(3)      124.8(4)    ?     . . 66503
P(1)      O(10)     W(3)      124.8(4)    ?     . . 56505
P(1)      O(10)     O(10)     89(120)     ?     . . 66503
O(10)     P(1)      O(10)     0.0586(7)   ?     66503 . .
P(1)      O(10)     O(10)     90(120)     ?     . . 56505
O(10)     P(1)      O(10)     0.0586(7)   ?     56505 . .
P(1)      O(10)     P(1)      0.0586(7)   ?     . 66503 66503
P(1)      O(10)     P(1)      0.0586(7)   ?     . 66503 56505
P(1)      O(10)     W(3)      124.8(4)    ?     . 66503 66503
P(1)      O(10)     W(3)      124.8(4)    ?     . 66503 56505
P(1)      O(10)     O(10)     89(120)     ?     . 66503 .
P(1)      O(10)     O(10)     89(120)     ?     . 66503 56505
O(10)     P(1)      O(10)     0.0586(6)   ?     56505 . 66503
P(1)      O(10)     P(1)      0.0586(7)   ?     . 56505 66503
P(1)      O(10)     P(1)      0.0586(7)   ?     . 56505 56505
P(1)      O(10)     W(3)      124.8(4)    ?     . 56505 66503
P(1)      O(10)     W(3)      124.8(4)    ?     . 56505 56505
P(1)      O(10)     O(10)     89(120)     ?     . 56505 .
P(1)      O(10)     O(10)     89(120)     ?     . 56505 66503
P(1)      O(3)      W(2)      127.8(9)    ?     66503 . 56505
P(1)      O(3)      W(2)      127.8(9)    ?     56505 . 56505
O(3)      W(2)      O(5)      73.8(5)     ?     . 56505 .
O(3)      W(2)      O(1)      84.2(5)     ?     . 56505 56505
O(3)      W(2)      O(7)      81.4(4)     ?     . 56505 56505
O(3)      W(2)      O(8)      82.6(5)     ?     . 56505 56505
O(3)      W(2)      O(9)      172.6(7)    ?     . 56505 56505
O(3)      P(1)      P(1)      144(67)     ?     . 66503 56505
P(1)      O(3)      P(1)      0.0(3)      ?     56505 . 66503
O(3)      P(1)      O(3)      111.2(8)    ?     . 66503 66503
O(3)      P(1)      O(10)     107.8(5)    ?     . 66503 .
O(3)      P(1)      O(10)     107.7(5)    ?     . 66503 66503
O(3)      P(1)      O(10)     107.8(5)    ?     . 66503 56505
O(3)      P(1)      O(3)      111.2(8)    ?     . 66503 56505
O(3)      P(1)      P(1)      35(66)      ?     . 56505 66503
O(3)      P(1)      O(3)      111.2(8)    ?     . 56505 66503
O(3)      P(1)      O(10)     107.7(5)    ?     . 56505 .
O(3)      P(1)      O(10)     107.6(5)    ?     . 56505 66503
O(3)      P(1)      O(10)     107.7(5)    ?     . 56505 56505
O(3)      P(1)      O(3)      111.1(8)    ?     . 56505 56505
O(4)      W(1)      O(1)      88.2(6)     ?     . 55510 55510
O(4)      W(1)      O(3)      82.3(8)     ?     . 55510 55510
O(4)      W(1)      O(5)      92.0(6)     ?     . 55510 55510
O(4)      W(1)      O(6)      100.0(9)    ?     . 55510 55510
O(5)      W(2)      O(1)      157.8(4)    ?     . 56505 56505
O(5)      W(2)      O(7)      87.5(7)     ?     . 56505 56505
O(5)      W(2)      O(8)      91.2(9)     ?     . 56505 56505
O(5)      W(2)      O(9)      98.9(7)     ?     . 56505 56505
O(8)      W(2)      O(1)      89.3(6)     ?     . 55510 55510
O(8)      W(2)      O(3)      82.6(8)     ?     . 55510 66512
O(8)      W(2)      O(5)      91.2(7)     ?     . 55510 66512
O(8)      W(2)      O(9)      99.2(9)     ?     . 55510 55510
P(1)      O(10)     W(3)      124.9(4)    ?     66503 . 66503
P(1)      O(10)     W(3)      124.8(4)    ?     56505 . 66503
W(3)      O(10)     W(3)      90.7(5)     ?     56505 . 66503
O(10)     W(3)      O(10)     0.0(5)      ?     . 66503 66503
O(10)     O(10)     W(3)      135(77)     ?     66503 . 66503
O(10)     W(3)      O(10)     0.0(5)      ?     . 66503 56505
O(10)     O(10)     W(3)      90(49)      ?     56505 . 66503
O(10)     W(3)      O(12)     73.2(4)     ?     . 66503 66503
O(10)     W(3)      O(12)     73.2(5)     ?     . 66503 56505
O(10)     W(3)      O(2)      84.5(5)     ?     . 66503 66503
O(10)     W(3)      O(7)      83.6(5)     ?     . 66503 66503
P(1)      O(10)     W(3)      124.8(4)    ?     66503 . 56505
P(1)      O(10)     W(3)      124.9(4)    ?     56505 . 56505
O(10)     W(3)      O(10)     0.0(5)      ?     . 56505 66503
O(10)     O(10)     W(3)      89(49)      ?     66503 . 56505
O(10)     W(3)      O(10)     0.0(5)      ?     . 56505 56505
O(10)     O(10)     W(3)      134(75)     ?     56505 . 56505
O(10)     W(3)      O(12)     73.2(4)     ?     . 56505 .
O(10)     W(3)      O(12)     73.2(5)     ?     . 56505 56505
O(10)     W(3)      O(2)      84.5(5)     ?     . 56505 56505
O(10)     W(3)      O(7)      83.7(4)     ?     . 56505 56505
O(10)     W(3)      O(11)     171.3(7)    ?     . 56505 56505
O(10)     P(1)      P(1)      89(110)     ?     . 66503 56505
P(1)      O(10)     P(1)      0.0586(7)   ?     56505 . 66503
O(10)     P(1)      O(3)      107.7(5)    ?     . 66503 66503
O(10)     P(1)      O(10)     0.0586(7)   ?     . 66503 66503
O(10)     O(10)     P(1)      89(120)     ?     66503 . 66503
O(10)     P(1)      O(10)     0.0586(6)   ?     . 66503 56505
O(10)     O(10)     P(1)      89(120)     ?     56505 . 66503
O(10)     P(1)      O(3)      107.6(5)    ?     . 66503 56505
O(10)     P(1)      P(1)      89(110)     ?     . 56505 66503
O(10)     P(1)      O(3)      107.8(5)    ?     . 56505 66503
O(10)     P(1)      O(10)     0.0586(6)   ?     . 56505 66503
O(10)     O(10)     P(1)      89(120)     ?     66503 . 56505
O(10)     P(1)      O(10)     0.0586(7)   ?     . 56505 56505
O(10)     O(10)     P(1)      89(120)     ?     56505 . 56505
O(10)     P(1)      O(3)      107.6(5)    ?     . 56505 56505
O(10)     O(10)     P(1)      90(120)     ?     . 66503 66503
O(10)     O(10)     P(1)      89(120)     ?     . 66503 56505
O(10)     O(10)     W(3)      43(76)      ?     . 66503 66503
O(10)     O(10)     W(3)      90(49)      ?     . 66503 56505
O(10)     O(10)     O(10)     60(67)      ?     . 66503 56505
O(10)     O(10)     O(10)     59(67)      ?     56505 . 66503
O(10)     O(10)     P(1)      89(120)     ?     . 56505 66503
O(10)     O(10)     P(1)      89(120)     ?     . 56505 56505
O(10)     O(10)     W(3)      89(49)      ?     . 56505 66503
O(10)     O(10)     W(3)      45(75)      ?     . 56505 56505
O(10)     O(10)     O(10)     60(67)      ?     . 56505 66503
O(12)     W(3)      O(10)     73.2(4)     ?     . 56505 66503
O(12)     W(3)      O(10)     73.2(4)     ?     . 56505 56505
O(12)     W(3)      O(12)     88.3(7)     ?     . 56505 56505
O(12)     W(3)      O(2)      157.4(6)    ?     . 56505 56505
O(12)     W(3)      O(7)      87.4(7)     ?     . 56505 56505
O(12)     W(3)      O(11)     100.3(8)    ?     . 56505 56505
Cr(1)     O(13)     Cr(1)     120.0(2)    ?     66505 . 65503
O(13)     Cr(1)     O(13)     0.0173(1)   ?     . 65503 65503
O(13)     O(13)     Cr(1)     159.3(1)    ?     65503 . 65503
O(13)     Cr(1)     O(13)     0.0309(1)   ?     . 65503 66505
O(13)     O(13)     Cr(1)     140.7(1)    ?     66505 . 65503
O(13)     Cr(1)     O(16)     94.3(7)     ?     . 65503 65503
O(13)     Cr(1)     O(16)     94.3(7)     ?     . 65503 65512
O(13)     Cr(1)     O(13)     0.0173(1)   ?     . 65503 65503
O(13)     O(13)     Cr(1)     159.3(1)    ?     65503 . 65503
O(13)     Cr(1)     O(13)     0.0309(1)   ?     . 65503 66505
O(13)     O(13)     Cr(1)     140.7(1)    ?     66505 . 65503
O(13)     Cr(1)     O(14)     95.6(8)     ?     . 65503 65503
O(13)     Cr(1)     O(14)     95.6(8)     ?     . 65503 65512
O(13)     Cr(1)     O(13)     0.0309(2)   ?     . 66505 65503
O(13)     O(13)     Cr(1)     39.2(2)     ?     65503 . 66505
O(13)     Cr(1)     O(13)     0.0481(1)   ?     . 66505 66505
O(13)     O(13)     Cr(1)     99.2(2)     ?     66505 . 66505
O(13)     Cr(1)     O(14)     95.6(5)     ?     . 66505 66505
O(13)     Cr(1)     O(14)     95.6(5)     ?     . 66505 66508
O(13)     Cr(1)     O(13)     0.0309(2)   ?     . 66505 65503
O(13)     O(13)     Cr(1)     39.2(2)     ?     65503 . 66505
O(13)     Cr(1)     O(13)     0.0481(1)   ?     . 66505 66505
O(13)     O(13)     Cr(1)     99.2(2)     ?     66505 . 66505
O(13)     Cr(1)     O(16)     94.3(5)     ?     . 66505 66505
O(13)     Cr(1)     O(16)     94.3(5)     ?     . 66505 66508
O(13)     Cr(1)     O(15)     179(1)      ?     . 66505 66505
O(13)     O(13)     Cr(1)     99.2(2)     ?     . 65503 .
Cr(1)     O(13)     O(13)     80.7(2)     ?     . . 65503
O(13)     O(13)     Cr(1)     20.7(1)     ?     . 65503 65503
Cr(1)     O(13)     O(13)     159.3(1)    ?     65503 . 65503
O(13)     O(13)     Cr(1)     140.7(2)    ?     . 65503 66505
Cr(1)     O(13)     O(13)     39.2(2)     ?     66505 . 65503
O(13)     O(13)     O(13)     60(111)     ?     . 65503 66505
O(13)     O(13)     O(13)     59(162)     ?     66505 . 65503
O(13)     O(13)     Cr(1)     159.3(2)    ?     . 66505 .
Cr(1)     O(13)     O(13)     20.7(2)     ?     . . 66505
O(13)     O(13)     Cr(1)     39.2(1)     ?     . 66505 65503
Cr(1)     O(13)     O(13)     140.7(1)    ?     65503 . 66505
O(13)     O(13)     Cr(1)     80.7(2)     ?     . 66505 66505
Cr(1)     O(13)     O(13)     99.2(2)     ?     66505 . 66505
O(13)     O(13)     O(13)     60(110)     ?     . 66505 65503
O(14)     C(1)      O(16)     122(2)      ?     . 65503 65503
O(16)     C(1)      O(14)     122(2)      ?     . . 66505
O(19)     O(19)     C(2)      61(1)       ?     . 55510 .
C(2)      O(19)     O(19)     61(1)       ?     . . 55510
O(19)     O(19)     Cr(2)     136(2)      ?     . 55510 55510
O(19)     C(2)      O(19)     57(2)       ?     . . 55510
O(21)     O(21)     Cr(2)     136(2)      ?     . 55510 55510
C(1)      O(14)     Cr(1)     134(1)      ?     . 66505 66505
C(2)      O(19)     Cr(2)     141(2)      ?     . 55510 55510

loop_
_geom_torsion_atom_site_label_1
_geom_torsion_atom_site_label_2
_geom_torsion_atom_site_label_3
_geom_torsion_atom_site_label_4
_geom_torsion
_geom_torsion_publ_flag
_geom_torsion_site_symmetry_1
_geom_torsion_site_symmetry_2
_geom_torsion_site_symmetry_3
_geom_torsion_site_symmetry_4
O(2)      W(1)      O(1)      W(2)      31(1)       ?     . . . .
O(3)      W(1)      O(1)      W(2)      -51(1)      ?     . . . .
O(4)      W(1)      O(1)      W(2)      -133(1)     ?     . . . .
O(5)      W(1)      O(1)      W(2)      -42(2)      ?     . . . .
O(6)      W(1)      O(1)      W(2)      126(1)      ?     . . . .
O(1)      W(1)      O(2)      W(3)      -28(2)      ?     . . . .
O(3)      W(1)      O(2)      W(3)      55(2)       ?     . . . .
O(4)      W(1)      O(2)      W(3)      36(3)       ?     . . . .
O(5)      W(1)      O(2)      W(3)      129(2)      ?     . . . .
O(6)      W(1)      O(2)      W(3)      -133(2)     ?     . . . .
O(1)      W(1)      O(3)      P(1)      39(1)       ?     . . . .
O(2)      W(1)      O(3)      P(1)      -46(1)      ?     . . . .
O(4)      W(1)      O(3)      P(1)      128(1)      ?     . . . .
O(5)      W(1)      O(3)      P(1)      -137(1)     ?     . . . .
O(7)      W(2)      O(1)      W(1)      -30(1)      ?     . . . .
O(8)      W(2)      O(1)      W(1)      133(1)      ?     . . . .
O(9)      W(2)      O(1)      W(1)      -126(1)     ?     . . . .
O(1)      W(2)      O(7)      W(3)      24(2)       ?     . . . .
O(8)      W(2)      O(7)      W(3)      -48(3)      ?     . . . .
O(9)      W(2)      O(7)      W(3)      127(2)      ?     . . . .
O(7)      W(3)      O(2)      W(1)      28(2)       ?     . . . .
O(10)     W(3)      O(2)      W(1)      -55(2)      ?     . . . .
O(11)     W(3)      O(2)      W(1)      130(2)      ?     . . . .
O(12)     W(3)      O(2)      W(1)      -128(2)     ?     . . . .
O(2)      W(3)      O(7)      W(2)      -24(2)      ?     . . . .
O(10)     W(3)      O(7)      W(2)      59(2)       ?     . . . .
O(11)     W(3)      O(7)      W(2)      -126(1)     ?     . . . .
O(12)     W(3)      O(7)      W(2)      53(2)       ?     . . . .
O(2)      W(3)      O(10)     P(1)      43(2)       ?     . . . .
O(7)      W(3)      O(10)     P(1)      -44(2)      ?     . . . .
O(12)     W(3)      O(10)     P(1)      133(2)      ?     . . . .
O(13)     Cr(1)     O(16)     C(1)      -22(9)      ?     . . . .
O(14)     Cr(1)     O(16)     C(1)      -118(3)     ?     . . . .
O(15)     Cr(1)     O(16)     C(1)      156(4)      ?     . . . .
O(17)     Cr(2)     O(19)     C(2)      166(10)     ?     . . . .
O(18)     Cr(2)     O(19)     C(2)      78(10)      ?     . . . .
O(21)     Cr(2)     O(19)     C(2)      -110(10)    ?     . . . .
O(22)     Cr(2)     O(19)     C(2)      -15(10)     ?     . . . .
O(17)     Cr(2)     O(20)     C(3)      151(3)      ?     . . . .
O(18)     Cr(2)     O(20)     C(3)      -120(3)     ?     . . . .
O(21)     Cr(2)     O(20)     C(3)      68(3)       ?     . . . .
O(22)     Cr(2)     O(20)     C(3)      -27(3)      ?     . . . .
O(10)     P(1)      O(3)      W(1)      63(4)       ?     . . . .
O(3)      P(1)      O(10)     W(3)      -59(5)      ?     . . . .

loop_
_geom_contact_atom_site_label_1
_geom_contact_atom_site_label_2
_geom_contact_distance
_geom_contact_publ_flag
_geom_contact_site_symmetry_1
_geom_contact_site_symmetry_2
W(1)      W(2)      3.363(1)    ?     . 56505
W(1)      P(1)      3.5298(9)   ?     . .
W(1)      P(1)      3.5282(9)   ?     . 66503
W(1)      P(1)      3.5290(9)   ?     . 56505
W(2)      W(1)      3.363(1)    ?     . 66503
W(2)      P(1)      3.5192(9)   ?     . .
W(2)      P(1)      3.5184(9)   ?     . 66503
W(2)      P(1)      3.5176(9)   ?     . 56505
W(3)      W(3)      3.385(2)    ?     . 66503
W(3)      W(3)      3.385(2)    ?     . 56505
W(3)      P(1)      3.518(6)    ?     . .
W(3)      P(1)      3.517(6)    ?     . 66503
W(3)      P(1)      3.517(6)    ?     . 56505
W(3)      O(12)     3.58(2)     ?     . 56505
Cr(1)     Cr(1)     3.257(9)    ?     . 65503
Cr(1)     Cr(1)     3.257(5)    ?     . 66505
Cr(1)     O(14)     3.32(2)     ?     . 66505
Cr(1)     O(14)     3.32(2)     ?     . 66508
Cr(1)     O(16)     3.31(2)     ?     . 65503
Cr(1)     O(16)     3.31(2)     ?     . 65512
Cr(1)     C(1)      2.98(2)     ?     . .
Cr(1)     C(1)      2.96(3)     ?     . 65503
Cr(1)     C(1)      2.98(2)     ?     . 55510
Cr(1)     C(1)      2.96(3)     ?     . 65512
Cr(2)     O(19)     3.08(3)     ?     . 55510
Cr(2)     O(21)     3.09(3)     ?     . 55510
Cr(2)     C(2)      3.17(4)     ?     . .
Cr(2)     C(3)      2.86(5)     ?     . .
P(1)      W(1)      3.5290(6)   ?     . 66503
P(1)      W(1)      3.5282(9)   ?     . 56505
P(1)      W(2)      3.5176(9)   ?     . 66503
P(1)      W(2)      3.5184(6)   ?     . 56505
P(1)      W(3)      3.517(6)    ?     . 66503
P(1)      W(3)      3.517(6)    ?     . 56505
P(1)      O(1)      3.35(2)     ?     . .
P(1)      O(1)      3.34(1)     ?     . 66503
P(1)      O(1)      3.34(1)     ?     . 56505
P(1)      O(2)      3.35(2)     ?     . .
P(1)      O(2)      3.35(1)     ?     . 66503
P(1)      O(2)      3.35(2)     ?     . 56505
P(1)      O(7)      3.34(2)     ?     . .
P(1)      O(7)      3.33(2)     ?     . 66503
P(1)      O(7)      3.34(1)     ?     . 56505
O(1)      P(1)      3.34(2)     ?     . 66503
O(1)      P(1)      3.34(2)     ?     . 56505
O(1)      O(1)      3.13(2)     ?     . 55510
O(1)      O(2)      2.57(2)     ?     . .
O(1)      O(3)      2.88(2)     ?     . .
O(1)      O(3)      2.88(2)     ?     . 66503
O(1)      O(4)      2.63(2)     ?     . .
O(1)      O(6)      2.86(2)     ?     . .
O(1)      O(7)      2.60(2)     ?     . .
O(1)      O(8)      2.66(2)     ?     . .
O(1)      O(9)      2.81(2)     ?     . .
O(1)      C(1)      3.42(3)     ?     . .
O(2)      P(1)      3.35(2)     ?     . 66503
O(2)      P(1)      3.35(2)     ?     . 56505
O(2)      O(3)      2.85(2)     ?     . .
O(2)      O(5)      2.68(2)     ?     . .
O(2)      O(6)      2.71(2)     ?     . .
O(2)      O(7)      2.61(2)     ?     . .
O(2)      O(7)      3.15(2)     ?     . 56505
O(2)      O(10)     2.90(2)     ?     . .
O(2)      O(10)     2.90(2)     ?     . 66503
O(2)      O(10)     2.90(2)     ?     . 56505
O(2)      O(11)     2.81(2)     ?     . .
O(2)      O(12)     2.67(2)     ?     . .
O(2)      N(1)      3.05(3)     ?     . .
O(3)      O(1)      2.88(2)     ?     . 56505
O(3)      O(3)      2.50(1)     ?     . 66503
O(3)      O(3)      2.50(2)     ?     . 56505
O(3)      O(3)      3.04(2)     ?     . 55510
O(3)      O(4)      2.84(2)     ?     . .
O(3)      O(5)      2.61(2)     ?     . .
O(3)      O(7)      2.83(2)     ?     . 56505
O(3)      O(8)      2.84(2)     ?     . 56505
O(3)      O(10)     2.49(2)     ?     . .
O(3)      O(10)     2.49(2)     ?     . 66503
O(3)      O(10)     2.49(2)     ?     . 56505
O(4)      O(1)      2.63(2)     ?     . 55510
O(4)      O(3)      2.84(2)     ?     . 55510
O(4)      O(5)      2.74(2)     ?     . .
O(4)      O(5)      2.74(2)     ?     . 55510
O(4)      O(6)      2.76(2)     ?     . .
O(4)      O(6)      2.76(2)     ?     . 55510
O(4)      O(8)      3.03(3)     ?     . 56505
O(5)      O(6)      2.71(2)     ?     . .
O(5)      O(7)      2.67(2)     ?     . 56505
O(5)      O(8)      2.73(2)     ?     . 56505
O(5)      O(9)      2.77(2)     ?     . 56505
O(5)      O(18)     3.55(4)     ?     . 65503
O(5)      O(20)     3.45(3)     ?     . 56505
O(5)      O(21)     3.51(3)     ?     . 56505
O(5)      C(2)      3.41(4)     ?     . 65503
O(5)      C(3)      3.13(4)     ?     . 56505
O(6)      O(15)     3.14(3)     ?     . .
O(6)      O(16)     2.98(3)     ?     . .
O(6)      O(17)     3.20(3)     ?     . 65503
O(6)      O(18)     3.36(3)     ?     . 65503
O(6)      O(19)     3.50(3)     ?     . 65503
O(6)      O(23)     3.26(6)     ?     . 65503
O(6)      N(1)      3.33(3)     ?     . .
O(6)      C(1)      3.55(3)     ?     . .
O(7)      P(1)      3.34(2)     ?     . 66503
O(7)      P(1)      3.33(2)     ?     . 56505
O(7)      O(2)      3.15(2)     ?     . 66503
O(7)      O(3)      2.83(2)     ?     . 66503
O(7)      O(5)      2.67(2)     ?     . 66503
O(7)      O(9)      2.73(2)     ?     . .
O(7)      O(10)     2.88(2)     ?     . .
O(7)      O(10)     2.88(2)     ?     . 66503
O(7)      O(10)     2.88(2)     ?     . 56505
O(7)      O(11)     2.80(2)     ?     . .
O(7)      O(12)     2.64(2)     ?     . 66503
O(7)      N(1)      3.13(3)     ?     . 66507
O(8)      O(1)      2.66(2)     ?     . 55510
O(8)      O(3)      2.84(3)     ?     . 66503
O(8)      O(3)      2.84(3)     ?     . 66512
O(8)      O(4)      3.03(3)     ?     . 66503
O(8)      O(5)      2.73(2)     ?     . 66503
O(8)      O(5)      2.73(2)     ?     . 66512
O(8)      O(9)      2.74(2)     ?     . .
O(8)      O(9)      2.74(2)     ?     . 55510
O(9)      O(5)      2.77(2)     ?     . 66503
O(9)      O(14)     3.05(3)     ?     . 66505
O(9)      O(17)     2.69(3)     ?     . .
O(9)      O(20)     3.28(3)     ?     . .
O(9)      O(21)     3.36(3)     ?     . .
O(9)      O(23)     3.54(6)     ?     . .
O(9)      N(1)      3.18(3)     ?     . 66507
O(9)      C(1)      3.06(3)     ?     . .
O(10)     O(2)      2.90(1)     ?     . 66503
O(10)     O(2)      2.90(2)     ?     . 56505
O(10)     O(3)      2.49(2)     ?     . 66503
O(10)     O(3)      2.49(2)     ?     . 56505
O(10)     O(7)      2.88(2)     ?     . 66503
O(10)     O(7)      2.88(1)     ?     . 56505
O(10)     O(12)     2.59(2)     ?     . .
O(10)     O(12)     2.59(2)     ?     . 66503
O(10)     O(12)     2.59(2)     ?     . 56505
O(11)     O(11)     3.14(3)     ?     . 66507
O(11)     O(12)     2.81(3)     ?     . .
O(11)     O(12)     2.79(3)     ?     . 66503
O(11)     O(16)     3.54(2)     ?     . 66507
O(11)     N(1)      3.18(3)     ?     . .
O(11)     N(1)      3.20(3)     ?     . 66507
O(11)     C(1)      3.06(3)     ?     . 66507
O(12)     W(3)      3.58(1)     ?     . 66503
O(12)     O(7)      2.64(2)     ?     . 56505
O(12)     O(10)     2.59(2)     ?     . 66503
O(12)     O(10)     2.59(2)     ?     . 56505
O(12)     O(11)     2.79(3)     ?     . 56505
O(12)     O(12)     2.68(2)     ?     . 66503
O(12)     O(12)     2.68(3)     ?     . 56505
O(12)     O(23)     2.85(4)     ?     . 66507
O(13)     O(14)     2.84(2)     ?     . .
O(13)     O(14)     2.83(2)     ?     . 65503
O(13)     O(14)     2.84(2)     ?     . 66505
O(13)     O(14)     2.84(2)     ?     . 66508
O(13)     O(14)     2.84(2)     ?     . 55510
O(13)     O(14)     2.83(2)     ?     . 65512
O(13)     O(16)     2.83(2)     ?     . .
O(13)     O(16)     2.83(2)     ?     . 65503
O(13)     O(16)     2.83(2)     ?     . 66505
O(13)     O(16)     2.83(2)     ?     . 66508
O(13)     O(16)     2.83(2)     ?     . 55510
O(13)     O(16)     2.83(2)     ?     . 65512
O(13)     C(1)      3.18(3)     ?     . .
O(13)     C(1)      3.18(2)     ?     . 65503
O(13)     C(1)      3.18(2)     ?     . 66505
O(13)     C(1)      3.18(2)     ?     . 66508
O(13)     C(1)      3.18(3)     ?     . 55510
O(13)     C(1)      3.18(2)     ?     . 65512
O(14)     Cr(1)     3.32(2)     ?     . 65503
O(14)     O(9)      3.05(2)     ?     . 65503
O(14)     O(13)     2.84(2)     ?     . 65503
O(14)     O(13)     2.83(2)     ?     . 66505
O(14)     O(14)     2.74(3)     ?     . 55510
O(14)     O(15)     2.72(4)     ?     . .
O(14)     O(16)     2.73(3)     ?     . .
O(14)     O(16)     2.19(3)     ?     . 65503
O(14)     O(16)     3.55(3)     ?     . 65512
O(14)     O(17)     3.20(4)     ?     . 65503
O(14)     O(23)     3.48(5)     ?     . 65503
O(14)     C(1)      3.43(3)     ?     . 65512
O(15)     O(6)      3.14(3)     ?     . 55510
O(15)     O(14)     2.72(4)     ?     . 55510
O(15)     O(16)     2.75(2)     ?     . .
O(15)     O(16)     2.75(2)     ?     . 55510
O(15)     O(17)     2.63(3)     ?     . 65503
O(15)     O(17)     2.63(3)     ?     . 65512
O(15)     O(19)     3.33(4)     ?     . 65503
O(15)     O(19)     3.33(4)     ?     . 65512
O(16)     Cr(1)     3.31(2)     ?     . 66505
O(16)     O(11)     3.54(2)     ?     . 66507
O(16)     O(13)     2.83(2)     ?     . 65503
O(16)     O(13)     2.83(2)     ?     . 66505
O(16)     O(14)     2.19(2)     ?     . 66505
O(16)     O(14)     3.55(2)     ?     . 66508
O(16)     O(16)     2.87(2)     ?     . 55510
O(16)     C(1)      3.50(3)     ?     . 55510
O(17)     O(6)      3.20(4)     ?     . 66505
O(17)     O(14)     3.20(3)     ?     . 66505
O(17)     O(15)     2.63(4)     ?     . 66505
O(17)     O(18)     2.76(4)     ?     . .
O(17)     O(19)     2.73(3)     ?     . .
O(17)     O(19)     3.58(3)     ?     . 55510
O(17)     O(20)     2.73(5)     ?     . .
O(17)     O(21)     2.68(5)     ?     . .
O(17)     O(21)     3.55(4)     ?     . 55510
O(17)     O(23)     2.37(5)     ?     . .
O(18)     O(5)      3.55(4)     ?     . 66505
O(18)     O(6)      3.36(4)     ?     . 66505
O(18)     O(19)     2.83(4)     ?     . .
O(18)     O(20)     2.74(6)     ?     . .
O(18)     O(22)     2.83(4)     ?     . .
O(18)     O(23)     3.23(4)     ?     . .
O(18)     N(1)      3.43(5)     ?     . 66505
O(19)     Cr(2)     3.08(3)     ?     . 55510
O(19)     O(6)      3.50(4)     ?     . 66505
O(19)     O(15)     3.33(3)     ?     . 66505
O(19)     O(17)     3.58(3)     ?     . 55510
O(19)     O(21)     2.74(5)     ?     . .
O(19)     O(21)     3.04(5)     ?     . 55510
O(19)     O(22)     2.88(4)     ?     . .
O(20)     O(5)      3.45(4)     ?     . 66503
O(20)     O(21)     2.81(4)     ?     . .
O(20)     O(22)     2.80(3)     ?     . .
O(20)     O(23)     3.58(7)     ?     . .
O(20)     N(1)      3.39(4)     ?     . 66507
O(21)     Cr(2)     3.09(3)     ?     . 55510
O(21)     O(5)      3.51(4)     ?     . 66503
O(21)     O(17)     3.55(4)     ?     . 55510
O(21)     O(19)     3.04(5)     ?     . 55510
O(21)     O(22)     2.91(3)     ?     . .
O(21)     C(3)      3.32(5)     ?     . .
O(22)     C(2)      3.40(6)     ?     . .
O(22)     C(3)      3.06(4)     ?     . .
O(23)     O(6)      3.26(5)     ?     . 66505
O(23)     O(12)     2.85(4)     ?     . 66507
O(23)     O(14)     3.48(4)     ?     . 66505
O(23)     N(1)      3.05(6)     ?     . 66505
O(23)     N(1)      2.99(7)     ?     . 66507
N(1)      O(7)      3.13(3)     ?     . 66507
N(1)      O(9)      3.18(3)     ?     . 66507
N(1)      O(11)     3.20(3)     ?     . 66507
N(1)      O(18)     3.43(4)     ?     . 65503
N(1)      O(20)     3.39(4)     ?     . 66507
N(1)      O(23)     3.05(7)     ?     . 65503
N(1)      O(23)     2.99(7)     ?     . 66507
N(1)      C(3)      3.58(4)     ?     . 56505
C(1)      Cr(1)     2.96(2)     ?     . 66505
C(1)      O(11)     3.06(3)     ?     . 66507
C(1)      O(13)     3.18(3)     ?     . 65503
C(1)      O(13)     3.18(3)     ?     . 66505
C(1)      O(14)     3.43(3)     ?     . 66508
C(1)      O(16)     3.50(3)     ?     . 55510
C(2)      Cr(2)     3.17(4)     ?     . 55510
C(2)      O(5)      3.41(6)     ?     . 66505
C(2)      O(5)      3.41(6)     ?     . 66508
C(2)      O(22)     3.40(6)     ?     . 55510
C(3)      O(5)      3.13(4)     ?     . 66503
C(3)      N(1)      3.58(6)     ?     . 66503

#==============================================================================

#     End of CIF

#==============================================================================
